# Supplementary material
Source: PubMed Central journal article supplement (PMC1904374)
Supplement: pcbi.0030106.st001.pdf [file pcbi.0030106.st001.pdf]

**ORegAnno Supporting Evidence Classes**

| Gene Name<br>(Entrez Gene ID /<br>Ensembl Stable<br>Transcript ID) | ORegAnno<br>Stable ID<br>(dbSNP ID) | <b>OREGES00001</b><br>Direct Gel Shift | <b>OREGES00002</b><br>Supershift | <b>OREGES00003</b><br>Gel Shift Competition | <b>OREGES00004</b><br>Transient Transfection<br>Luciferase Assay | <b>OREGES00007</b><br>RT-PCR | <b>OREGES00009</b><br>Allele-specific Transcript<br>Quantification | <b>OREGES00010</b><br>Resequencing | <b>OREGES00011</b><br>Single-stranded<br>Conformational<br>Polymorphism | <b>OREGES00015</b><br>DNase Footprinting<br>Assay | <b>OREGES00019</b><br>CAT Assay | <b>OREGES00020</b><br>RLM-RACE | <b>OREGES00033</b><br>Methylation Interference<br>Assay |
|--------------------------------------------------------------------|-------------------------------------|----------------------------------------|----------------------------------|---------------------------------------------|------------------------------------------------------------------|------------------------------|--------------------------------------------------------------------|------------------------------------|-------------------------------------------------------------------------|---------------------------------------------------|---------------------------------|--------------------------------|---------------------------------------------------------|
| ABCA1<br>EntrezGene:19<br>Ensembl:ENST00000297693                  | OREG0001970<br>rs2422493            |                                        |                                  | 2                                           | 1                                                                | 1                            |                                                                    |                                    |                                                                         |                                                   |                                 |                                |                                                         |
| ADH4<br>EntrezGene:127<br>Ensembl:ENST00000265512                  | OREG0000364<br>rs1800759            |                                        |                                  |                                             | 1                                                                |                              |                                                                    |                                    |                                                                         |                                                   |                                 |                                |                                                         |
| ADRB2<br>EntrezGene:154<br>Ensembl:ENST00000305988                 | OREG0000076<br>rs11959427           | 1                                      |                                  |                                             |                                                                  |                              | 1                                                                  |                                    |                                                                         |                                                   |                                 |                                |                                                         |
| AGER<br>EntrezGene:177<br>Ensembl:ENST00000326486                  | OREG0001961<br>rs1800625            | 2                                      |                                  |                                             | 1                                                                |                              |                                                                    |                                    |                                                                         |                                                   |                                 |                                |                                                         |
|                                                                    | OREG0001962<br>rs1800624            | 2                                      |                                  | 1                                           | 1                                                                |                              |                                                                    |                                    |                                                                         |                                                   |                                 |                                |                                                         |
| AGRP<br>EntrezGene:181<br>Ensembl:ENST00000290953                  | OREG0001960<br>rs5030981            | 2                                      |                                  |                                             | 2                                                                |                              |                                                                    |                                    |                                                                         |                                                   |                                 |                                |                                                         |
| AGT<br>EntrezGene:183<br>Ensembl:ENST00000258224                   | OREG0000409<br>rs5050               | 1                                      | 2                                |                                             |                                                                  |                              |                                                                    |                                    |                                                                         |                                                   | 4                               |                                |                                                         |
|                                                                    | OREG0001957<br>rs1800585            |                                        |                                  | 1                                           | 1                                                                |                              |                                                                    |                                    |                                                                         |                                                   |                                 |                                |                                                         |
|                                                                    | OREG0001958<br>rs5051               | 1                                      |                                  | 1                                           |                                                                  |                              |                                                                    |                                    |                                                                         |                                                   | 2                               |                                |                                                         |
| AKR1B1<br>EntrezGene:231<br>Ensembl:ENST00000285930                | OREG0000093                         | 1                                      |                                  |                                             | 1                                                                |                              |                                                                    |                                    |                                                                         |                                                   |                                 |                                |                                                         |
| APOA1                                                              | OREG0001956                         |                                        |                                  | 2                                           | 1                                                                |                              |                                                                    |                                    |                                                                         |                                                   | 1                               |                                |                                                         |

|                                                    |                           |   |   |   |   |   |  |  |   |   |   |  |  |
|----------------------------------------------------|---------------------------|---|---|---|---|---|--|--|---|---|---|--|--|
| EntrezGene:335<br>EnsEMBL:ENST00000236850          | rs17243116                |   |   |   |   |   |  |  |   |   |   |  |  |
| APOA2<br>EntrezGene:336<br>EnsEMBL:ENST00000289906 | OREG0001857               |   |   |   | 2 |   |  |  |   |   |   |  |  |
|                                                    | OREG0001955               | 1 |   | 1 |   |   |  |  |   |   | 1 |  |  |
| APOB<br>EntrezGene:338<br>EnsEMBL:ENST00000233242  | OREG0001954<br>rs934197   | 1 |   | 1 |   |   |  |  |   |   | 1 |  |  |
|                                                    | OREG0001952               | 1 |   |   |   |   |  |  |   |   | 1 |  |  |
| APOC3<br>EntrezGene:345<br>EnsEMBL:ENST00000227667 | OREG0001953               |   |   | 1 | 1 |   |  |  |   |   |   |  |  |
|                                                    | OREG0001950<br>rs449647   | 1 |   |   | 1 |   |  |  |   |   |   |  |  |
| APOE<br>EntrezGene:348<br>EnsEMBL:ENST00000252486  | OREG0001951<br>rs405509   | 1 |   |   | 1 |   |  |  |   |   |   |  |  |
|                                                    | OREG0000089<br>rs8178822  | 1 |   |   | 1 |   |  |  |   |   |   |  |  |
| APP<br>EntrezGene:351<br>EnsEMBL:ENST00000346798   | OREG0001905<br>rs466448   | 1 |   | 1 |   |   |  |  |   |   | 1 |  |  |
|                                                    | OREG0000146<br>rs12885713 | 1 |   |   | 1 | 1 |  |  | 1 |   |   |  |  |
| CAT<br>EntrezGene:847<br>EnsEMBL:ENST00000241052   | OREG0001834<br>rs17880664 |   |   |   | 2 |   |  |  |   |   |   |  |  |
|                                                    | OREG0001949<br>rs17879971 | 2 |   | 1 | 2 |   |  |  |   |   |   |  |  |
| CCL5<br>EntrezGene:6352<br>EnsEMBL:ENST00000293272 | OREG0000007<br>rs2107538  |   | 1 |   | 1 |   |  |  |   | 1 |   |  |  |
|                                                    | OREG0001920<br>rs2280788  |   |   |   | 2 |   |  |  | 1 |   |   |  |  |
| CD14<br>EntrezGene:929<br>EnsEMBL:ENST00000302014  | OREG0000090<br>rs2569190  |   | 1 | 1 | 1 |   |  |  |   |   |   |  |  |
| CDH1<br>EntrezGene:999<br>EnsEMBL:ENST00000261769  | OREG0001948<br>rs16260    | 1 |   | 1 | 1 |   |  |  |   | 1 |   |  |  |
| CETP<br>EntrezGene:1071                            | OREG0001947<br>rs1800775  | 1 | 1 | 1 | 2 |   |  |  |   | 1 |   |  |  |

|                                                        |                           |   |   |   |   |  |  |   |  |  |  |   |  |
|--------------------------------------------------------|---------------------------|---|---|---|---|--|--|---|--|--|--|---|--|
| EnsEMBL:ENST00000200676                                |                           |   |   |   |   |  |  |   |  |  |  |   |  |
| CFTR<br>EntrezGene:1080<br>EnsEMBL:ENST00000003084     | OREG0000094               | 1 | 1 | 1 | 1 |  |  |   |  |  |  |   |  |
| COL18A1<br>EntrezGene:80781<br>EnsEMBL:ENST00000359759 | OREG0001732<br>rs755548   | 1 |   | 1 |   |  |  |   |  |  |  |   |  |
| CRYAA<br>EntrezGene:1409<br>EnsEMBL:ENST00000291554    | OREG0001861               |   |   |   | 2 |  |  |   |  |  |  |   |  |
| CSDA<br>EntrezGene:8531<br>EnsEMBL:ENST00000228251     | OREG0000014               |   |   |   | 1 |  |  |   |  |  |  |   |  |
| CTLA4<br>EntrezGene:1493<br>EnsEMBL:ENST00000302823    | OREG0000107<br>rs5742909  |   |   |   | 1 |  |  |   |  |  |  |   |  |
| CYP2A6<br>EntrezGene:1548<br>EnsEMBL:ENST00000301141   | OREG0000012<br>rs4803381  | 1 |   |   | 1 |  |  |   |  |  |  |   |  |
| CYP2B6<br>EntrezGene:1576<br>EnsEMBL:ENST00000324071   | OREG0000102               | 2 |   |   | 1 |  |  |   |  |  |  | 1 |  |
| CYP3A4<br>EntrezGene:1555<br>EnsEMBL:ENST00000336411   | OREG0000071               | 1 |   |   | 1 |  |  |   |  |  |  |   |  |
|                                                        | OREG0000099               | 1 |   |   |   |  |  | 1 |  |  |  |   |  |
| DLD<br>EntrezGene:1738<br>EnsEMBL:ENST00000205402      | OREG0001837<br>rs6943999  |   |   |   | 2 |  |  |   |  |  |  |   |  |
| DNASE2<br>EntrezGene:1777<br>EnsEMBL:ENST00000222219   | OREG0001946               |   |   |   | 2 |  |  |   |  |  |  |   |  |
| DRD4<br>EntrezGene:1815<br>EnsEMBL:ENST00000176183     | OREG0001945<br>rs12720380 |   |   |   |   |  |  |   |  |  |  | 1 |  |
| ECE1<br>EntrezGene:1889<br>EnsEMBL:ENST00000264205     | OREG0001971<br>rs213045   | 1 | 1 |   | 1 |  |  |   |  |  |  |   |  |
| ERCC1<br>EntrezGene:2067<br>EnsEMBL:ENST00000300853    | OREG0001838<br>rs3212931  |   |   |   | 2 |  |  |   |  |  |  |   |  |

|                                                        |                           |   |   |   |   |  |  |  |  |   |   |  |  |
|--------------------------------------------------------|---------------------------|---|---|---|---|--|--|--|--|---|---|--|--|
| F7<br>EntrezGene:2155<br>EnsEMBL:ENST00000261967       | OREG0000406               |   |   | 1 | 1 |  |  |  |  |   |   |  |  |
|                                                        | OREG0001941<br>rs510317   | 1 |   | 1 |   |  |  |  |  |   | 1 |  |  |
|                                                        | OREG0001942<br>rs7981123  | 1 |   | 1 |   |  |  |  |  |   | 1 |  |  |
| FECH<br>EntrezGene:2235<br>EnsEMBL:ENST00000262093     | OREG0000101               | 1 | 1 |   | 1 |  |  |  |  |   |   |  |  |
| FGB<br>EntrezGene:2244<br>EnsEMBL:ENST00000302068      | OREG0001939<br>rs1800791  | 1 |   |   |   |  |  |  |  |   | 1 |  |  |
|                                                        | OREG0001940<br>rs1800790  | 1 |   |   | 1 |  |  |  |  |   |   |  |  |
| GFPT1<br>EntrezGene:2673<br>EnsEMBL:ENST00000357308    | OREG0000073               |   |   |   | 1 |  |  |  |  |   |   |  |  |
| GSTA1<br>EntrezGene:2938<br>EnsEMBL:ENST00000334575    | OREG0001845<br>rs11964968 |   |   |   | 2 |  |  |  |  |   |   |  |  |
|                                                        | OREG0001846               |   |   |   | 2 |  |  |  |  |   |   |  |  |
| HBG2<br>EntrezGene:3048<br>EnsEMBL:ENST00000336906     | OREG0000405               | 1 |   | 1 |   |  |  |  |  | 1 |   |  |  |
|                                                        | OREG0000411               | 1 | 1 |   |   |  |  |  |  |   |   |  |  |
| HLA-DQB1<br>EntrezGene:3119<br>EnsEMBL:ENST00000334399 | OREG0001969<br>rs11568829 |   |   | 1 |   |  |  |  |  |   | 1 |  |  |
| HTR2C<br>EntrezGene:3358<br>EnsEMBL:ENST00000276198    | OREG0001848<br>rs3813929  |   |   |   | 2 |  |  |  |  |   |   |  |  |
| IAPP<br>EntrezGene:3375<br>EnsEMBL:ENST00000240652     | OREG0000095<br>rs11836625 | 1 | 1 | 1 | 1 |  |  |  |  |   |   |  |  |
| IGFBP3<br>EntrezGene:3486<br>EnsEMBL:ENST00000275521   | OREG0001936<br>rs2854744  | 1 |   |   | 1 |  |  |  |  |   |   |  |  |
| IL6<br>EntrezGene:3569<br>EnsEMBL:ENST00000258743      | OREG0000015<br>rs1800795  |   |   |   | 1 |  |  |  |  |   |   |  |  |
| ITGA2<br>EntrezGene:3673<br>EnsEMBL:ENST00000296585    | OREG0001934<br>rs28095    | 3 | 1 |   | 1 |  |  |  |  |   |   |  |  |
|                                                        | OREG0001935               | 1 | 1 |   | 1 |  |  |  |  | 1 |   |  |  |



|                                                       |                          |   |   |   |  |   |  |  |  |   |  |  |  |
|-------------------------------------------------------|--------------------------|---|---|---|--|---|--|--|--|---|--|--|--|
| EnsEMBL:ENST00000311854                               |                          |   |   |   |  |   |  |  |  |   |  |  |  |
| NPY<br>EntrezGene:4852<br>EnsEMBL:ENST00000242152     | OREG0001851<br>rs16147   |   |   |   |  | 2 |  |  |  |   |  |  |  |
| NPY2R<br>EntrezGene:4887<br>EnsEMBL:ENST00000329476   | OREG0001849              |   |   |   |  | 2 |  |  |  |   |  |  |  |
| PCSK1<br>EntrezGene:5122<br>EnsEMBL:ENST00000311106   | OREG0001872              |   |   |   |  | 2 |  |  |  |   |  |  |  |
| PON1<br>EntrezGene:5444<br>EnsEMBL:ENST00000222381    | OREG0001925<br>rs705379  |   |   |   |  | 1 |  |  |  |   |  |  |  |
|                                                       | OREG0001926<br>rs705381  |   |   |   |  | 1 |  |  |  |   |  |  |  |
|                                                       | OREG0001927<br>rs854572  |   |   |   |  | 1 |  |  |  |   |  |  |  |
|                                                       | OREG0001928<br>rs854571  |   |   |   |  | 1 |  |  |  |   |  |  |  |
| PRM2<br>EntrezGene:5620<br>EnsEMBL:ENST00000241808    | OREG0001828              |   |   |   |  | 2 |  |  |  |   |  |  |  |
|                                                       | OREG0001829              |   |   |   |  | 2 |  |  |  |   |  |  |  |
| PROC<br>EntrezGene:5624<br>EnsEMBL:ENST00000234071    | OREG0000108              | 1 | 1 | 1 |  | 1 |  |  |  |   |  |  |  |
| PRODH<br>EntrezGene:5625<br>EnsEMBL:ENST00000334029   | OREG0001847<br>rs386049  |   |   |   |  | 2 |  |  |  |   |  |  |  |
| PTGS2<br>EntrezGene:5743<br>EnsEMBL:ENST00000186982   | OREG0000105<br>rs20417   |   |   |   |  | 1 |  |  |  | 1 |  |  |  |
| PTPRCAP<br>EntrezGene:5790<br>EnsEMBL:ENST00000326294 | OREG0001835<br>rs869736  |   |   |   |  | 2 |  |  |  |   |  |  |  |
| RETN<br>EntrezGene:56729<br>EnsEMBL:ENST00000221515   | OREG0000075<br>rs1862513 |   | 1 | 1 |  | 1 |  |  |  | 1 |  |  |  |
| SERPINA3<br>EntrezGene:12<br>EnsEMBL:ENST00000261981  | OREG0001923<br>rs1884082 |   |   |   |  | 2 |  |  |  |   |  |  |  |

|                                                        |                           |   |   |   |   |  |  |   |   |  |  |  |  |
|--------------------------------------------------------|---------------------------|---|---|---|---|--|--|---|---|--|--|--|--|
| SERPIND1<br>EntrezGene:3053<br>EnsEMBL:ENST00000215727 | OREG0001866<br>rs165730   |   |   |   | 2 |  |  |   |   |  |  |  |  |
| SLC6A4<br>EntrezGene:6532<br>EnsEMBL:ENST00000261707   | OREG0000313<br>rs25531    | 1 |   |   |   |  |  | 1 |   |  |  |  |  |
| SLC9A1<br>EntrezGene:6548<br>EnsEMBL:ENST00000263980   | OREG0001827<br>rs11588974 |   |   |   | 2 |  |  |   |   |  |  |  |  |
| SPP1<br>EntrezGene:6696<br>EnsEMBL:ENST00000237623     | OREG0000088               | 2 |   |   | 1 |  |  |   |   |  |  |  |  |
|                                                        | OREG0000104               | 1 | 1 |   | 1 |  |  |   |   |  |  |  |  |
| TBX21<br>EntrezGene:30009<br>EnsEMBL:ENST00000177694   | OREG0000100<br>rs4794067  | 1 |   |   | 1 |  |  | 1 |   |  |  |  |  |
| TCOF1<br>EntrezGene:6949<br>EnsEMBL:ENST00000323668    | OREG0000314               | 2 |   |   | 1 |  |  |   |   |  |  |  |  |
| TF<br>EntrezGene:7018<br>EnsEMBL:ENST00000264998       | OREG0001868<br>rs4481157  |   |   |   | 2 |  |  |   |   |  |  |  |  |
|                                                        | OREG0001869<br>rs8177186  |   |   |   | 2 |  |  |   |   |  |  |  |  |
| THBD<br>EntrezGene:7056<br>EnsEMBL:ENST00000317606     | OREG0001959<br>rs13306848 |   |   |   | 1 |  |  | 1 |   |  |  |  |  |
| TNF<br>EntrezGene:7124<br>EnsEMBL:ENST00000229681      | OREG0000106<br>rs1800629  | 1 |   |   | 1 |  |  |   |   |  |  |  |  |
|                                                        | OREG0000110<br>rs1800750  | 1 | 1 | 1 | 1 |  |  |   | 1 |  |  |  |  |
|                                                        | OREG0001903<br>rs1800630  | 2 |   | 1 | 1 |  |  |   |   |  |  |  |  |

**Table 1: Investigated 104-rSNPs.** Each rSNP appears as an ORegAnno entry and dbSNP entry (if available) along with information describing the evidence that was used to identify this rSNP in its original publication. Each listed rSNP occurs within 2kb upstream of the Ensembl-annotated transcription start site (EnsEMBL transcript ids and associated EntrezGene ids are provided).
